## Chinese Herbal Medicine Tianqi Reduces Progression From Impaired Glucose Tolerance to Diabetes: A Double-Blind, Randomized, Placebo-Controlled, Multicenter Trial

Fengmei Lian, Guangwei Li, Xinyan Chen, Xiuzhi Wang, Chunli Piao, Jingfei Wang, Yuzhi Hong, Zhuoma Ba, Shentao Wu, Xiaoyan Zhou, Jiangming Lang, Yajun Liu, Rongfang Zhang, Jianjun Hao, Zhangzhi Zhu, Huilin Li, Hong Fang Liu, Aimei Cao, Zhu Yan, Yali An, Yujing Bai, Qiang Wang, Zhong Zhen, Chunhao Yu, Chong-Zhi Wang, Chun-Su Yuan,\* and Xiaolin Tong\*,†

**Context:** Living in a prediabetes state significantly increases a patient's risk for both diabetes and cardiovascular disease. Tianqi capsule, containing 10 Chinese herbal medicines, is used in China for the treatment of type 2 diabetes mellitus (T2DM).

**Objective:** The purpose of this study was to assess whether Tianqi prevented T2DM in subjects with impaired glucose tolerance (IGT) over the course of a 12-month treatment.

**Methods:** Individuals with IGT were randomly allocated in a double-blind manner to receive Tianqi (n = 210) or a placebo (n = 210) for 12 months. Oral glucose tolerance tests were conducted every 3 months to assess the development of diabetes or restoration to normal glucose tolerance. All subjects received the same lifestyle education. The primary endpoint was the conversion of IGT to T2DM. Body weight and body mass index were observed. Adverse effects were monitored.

**Results:** Of the 420 enrolled subjects with IGT, 389 completed the trial (198 in the Tianqi group and 191 in the placebo group). At the end of the 12-month trial, 36 subjects in the Tianqi group (18.18%) and 56 in the placebo group (29.32%) had developed diabetes ( $P = .01$ ). There was a significant difference in the number of subjects who had normal glucose tolerance at the end of the study between the Tianqi and placebo groups (n = 125, 63.13%, and n = 89, 46.60%, respectively;  $P = .001$ ). Cox's proportional hazards model analysis showed that Tianqi reduced the risk of diabetes by 32.1% compared with the placebo. No severe adverse events occurred in the trial. There were no statistical differences in body weight and body mass index changes between the Tianqi group and the placebo group during the 12-month trial.

**Conclusions:** Treatment with a Tianqi capsule for 12 months significantly decreased the incidence of T2DM in subjects with IGT, and this herbal drug was safe to use. (*J Clin Endocrinol Metab* 99: 648–655, 2014)

**P**rediabetes, including impaired glucose tolerance (IGT) and impaired fasting glucose, refers to a state in which the blood glucose level is higher than normal but does not meet the diagnostic criteria for diabetes mellitus (1, 2). IGT, defined as plasma glucose levels of 7.8–11.1

mmol/L measured 2 hours after a 75-g glucose load and a fasting plasma glucose (FPG) level greater than 7.0 mmol/L, is a major risk factor for type 2 diabetes mellitus (T2DM). In China, the overall prevalence of prediabetes is 15.5% (16.1% in men and 14.9% in women), with IGT

ISSN Print 0021-972X ISSN Online 1945-7197

Printed in U.S.A.

Copyright © 2014 by the Endocrine Society

Received August 24, 2013. Accepted November 6, 2013.

First Published Online January 16, 2014

\* X.T. and C.-S.Y. contributed equally to this work.

† Author affiliations are shown at the bottom of the next page.

Abbreviations: BMI, body mass index; BP, blood pressure; ESI, electrospray ionization; FPG, fasting plasma glucose; HbA1c, glycosylated hemoglobin; IGT, impaired glucose tolerance; LDL, low-density lipoprotein; NGT, normal glucose tolerance; OGTT, oral glucose tolerance test; T2DM, type 2 diabetes mellitus; UPLC, ultraperformance liquid chromatography.

being 2.5-fold more common than impaired fasting glucose (3). People with IGT have long been recognized to be at a substantially increased risk for both diabetes and cardiovascular disease. Approximately 90% of people with IGT progress to overt T2DM within 20 years in the absence of appropriate intervention, and half of the patients experience at least one myocardial infarction or stroke event (4). Thus, preventing the transition of IGT to T2DM represents an important approach in combating the T2DM pandemic.

Clinical studies have demonstrated that lifestyle interventions are effective for preventing the progression of IGT to diabetes. Study data have also indicated that insulin sensitizers,  $\alpha$ -glucosidase inhibitors, and metformin can, to some extent, delay the development of diabetes. However, no published studies to date have described the role of traditional Chinese herbal medicines in this regard.

Tianqi capsule is a novel Chinese herbal medicine for the treatment of T2DM in China (5, 6). Manufactured by Heilongjiang Baoquan Pharmaceutical Co, this herbal drug consists of 10 Chinese herbal medicines, *Astragali Radix*, *Coptidis Rhizoma*, *Trichosanthis Radix*, *Ligustri Lucidi Fructus*, *Dendrobii Caulis*, *Ginseng Radix*, *Lycii Cortex*, *Ecliptae Herba*, *Galla Chinensis*, and *Corni Fructus*. The quality of these herbs and decoction preparation was in accordance with the Chinese Pharmacopoeia (2005). Previous studies have shown that astragaloside, a constituent of *Astragali Radix*, possesses a glucose-lowering activity comparable with that of diformin (7, 8). Berberine, a constituent of *Coptidis Rhizoma*, was reported to improve glycemic parameters, including glycosylated hemoglobin (HbA1c) and FPG (9–11). Studies have also shown that ginsenoside Re, a constituent of *Ginseng Radix*, has significant antihyperglycemic effects (12–14), whereas iridosides, constituents of *Corni Fructus*, prevented diabetic vascular complications (15). Another Chinese herbal formulation, TM81, has been reported to be safe and effective in treating patients with T2DM (16).

In an early observational study of 300 patients with T2DM, 8 weeks of Tianqi treatment reduced HbA1c by  $1.15\% \pm 1.58\%$  and decreased blood glucose levels before and 2 hours after a meal (5). In addition, a good safety profile of Tianqi was observed. Chinese herbal medicine is often used in the prevention of different medical condi-

tions. However, the effects of Tianqi in preventing the progression from IGT to T2DM have not been studied in a large-scale controlled trial. In this study, we performed a double-blind, randomized, placebo-controlled, parallel-group, multicenter trial to evaluate whether Tianqi capsule can prevent the progression of IGT to T2DM or restore normal glucose tolerance (NGT) in people with IGT.

## Materials and Methods

The research protocol was approved by the local Medical Ethics Commission in China. Study subjects were recruited from 11 research sites in China between August 18, 2008, and March 5, 2010.

### Subjects

Individuals who met all of the following criteria were eligible for this study: 1) had IGT with a 2-hour plasma glucose concentration of 7.8–11.1 mmol/L after a 75-g oral glucose tolerance test (OGTT) and fasting plasma glucose greater than 7.0 mmol/L (according to World Health Organization 1999 criteria); 2) aged 25–70 years; 3) had no history of using drugs to treat IGT; 4) had no participation in clinical trials within the 3 months before the study; and 5) signed the informed consent form.

Patients were excluded from the study if they met one of the following conditions: 1) had acute cardiocerebrovascular disease or myocardial infarction in the past 6 months; 2) were under severe stress or had secondary hyperglycemia; 3) were unable to adhere to the control diet or showed poor compliance; 4) had evidence of mental disorders; 5) females who were pregnant, lactating, planning for pregnancy, or sexually active but with no contraceptive measures; 6) had allergies to Tianqi or its constituents; 7) had other endocrine disorders or severe primary diseases; 8) had systolic blood pressure (BP) of 160 mm Hg or greater and diastolic BP of 100 mm Hg or greater; or 9) had serum total cholesterol of 6.22 mmol/L or greater (240 mg/dL) or low-density lipoprotein (LDL) cholesterol of 4.14 mmol/L or greater (160 mg/dL).

There were 804 subjects who participated in the initial screening, and 480 subjects were recruited as having IGT after a standardized 75-g OGTT. Informed consent was obtained from each study subject.

Based on the literature, under the lifestyle intervention, the conversion rate from IGT to NGT was approximately 30% (17–19). Under the lifestyle education, our pilot observations using the test herbs and a report using Chinese herbal medicine (20) showed that the conversion rate was approximately 46%. Thus, we needed to enroll 155 subjects per group to ensure an 80%

Guang'anmen Hospital, China Academy of Chinese Medical Sciences (F.L., X.C., Y.B., Z.Zhe., X.T.), and China Academy of Chinese Medical Sciences (Z.Y.), Beijing 100053, China; Fuwai Hospital of Cardiovascular Disease (G.L., Y.A.), Beijing, China; Beijing Pinggu Hospital of Traditional Chinese Medicine (X.W.), Beijing 101200, China; The Affiliated Hospital to Changchun University of Chinese Medicine (C.P.), Changchun 130021, China; Beijing Mentougou Hospital of Traditional Chinese Medicine (J.W.), Beijing 102300, China; Hangzhou Hospital of Traditional Chinese Medicine (Y.H.), Hangzhou 310007, China; Qinghai Hospital of Traditional Chinese Medicine (Z.B.), Qinghai 810000, China; First Teaching Hospital of Tianjin University of Traditional Chinese Medicine (S.W.), Tianjin 300192, China; Guangzhou Tianhe Hospital of Traditional Chinese Medicine (X.Z.), Guangzhou 510275, China; Foshan Hospital of Traditional Chinese Medicine (J.L.), Foshan, 528000 China; Beijing Huimin Hospital (Y.L.), Beijing, China; Yangquan First Municipal People's Hospital (R.Z.), Yangquan 045000, China; Guangzhou Huangpu Hospital of Traditional Chinese Medicine (J.H., Q.W.), Guangzhou 510700, China; First Affiliated Hospital of Guangzhou University of Chinese Medicine (Z.Zhu.), Guangzhou 510405, China; Shenzhen Hospital of Traditional Chinese Medicine (H.L.), Shenzhen 518033, China; Dongzhimen Hospital Affiliated to Beijing University of Chinese Medicine (H.F.L.), Beijing 100700, China; Beijing Changping Hospital of Traditional Chinese Medicine (A.C.), Beijing 100200, China; and Tang Center for Herbal Medicine Research (C.Y., C.-Z.W., C.-S.Y.), University of Chicago, Chicago, Illinois 60637

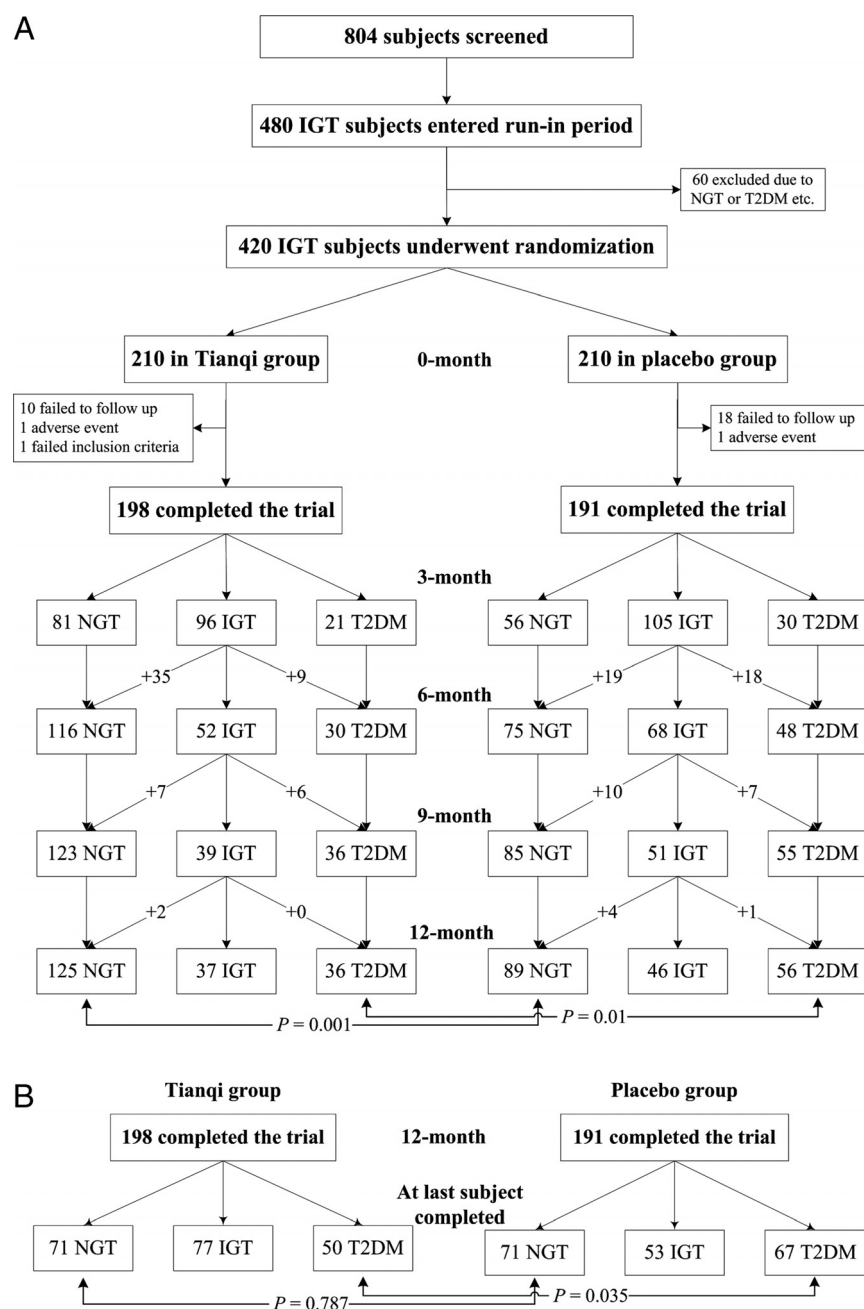

**Figure 1.** Progression of IGT in both Tianqi and placebo groups (A), and when last subject completed the study (B).

power to detect that the drug group has a significantly better conversion rate than the that of control group with lifestyle education. Considering factors such as dropouts, 210 subjects were recruited per group (Figure 1).

### Run-in period

The 480 subjects received 1 month of lifestyle education. They were then asked to complete another OGTT to confirm their IGT status. The lifestyle education did not intensely interfere with the subjects' lives, and after this washout period, a total of 420 subjects remained eligible and enrolled in the study. These subjects were subsequently randomized to receive either Tianqi or placebo (Figure 1).

### Lifestyle guidance

Dietary education consisted of advice on maintaining a balanced and reasonable diet. The intervention education included two face-to-face counseling sessions with certified nutritionists. The daily caloric requirements were calculated based on the individual subject's height, weight, and physical activities. A daily diet was selected based on clinical nutritional requirements using the Chinese Food Composition Table or Food Serving Exchange Table. The subjects were also asked to maintain their usual patterns of physical exercise and to continue normal daily lifestyles throughout the trial. Additional counseling sessions were held at 3 months, 6 months, and 9 months to ascertain that subjects followed the lifestyle guidance, or the subject would be excluded from the study.

### Study medication

The Tianqi capsules, manufactured by Heilongjiang Baoquan Pharmaceutical Co, were used. The placebo, which contained sugar-free starch and medicinal yellow iron oxide, was also supplied by the same manufacturer. The color, odor, shape, and packaging of the placebo capsules were exactly the same as those of the Tianqi capsules. The study drugs were supplied by the manufacturer free of charge, but the manufacturer was not involved in the design and analysis of the study.

### Chemical analysis of Tianqi capsules

The chemical composition of Tianqi capsules was analyzed using an ultraperformance liquid chromatography (UPLC)/mass spectrometry method. The UPLC system was a Waters ACQUITY instrument, with a Waters Synapt high-definition mass spectrometry system, and MassLynx version 4.1 software for peak identification and integration. The

separation was carried out on a Waters HSS T3 column (1.8  $\mu$ , 100  $\times$  2.1 mm inner diameter). For UPLC analysis, a 5- $\mu$ L test sample was injected into the column and eluted at 45°C with a constant flow rate of 0.5 mL/min. Water with 0.1% formic acid (solvent A) and acetonitrile with 0.1% formic acid (solvent B) were used. Gradient elution started with 99% solvent A and 1% solvent B, changed to 90% A for 1 minute, then to 75% A for 3 minutes, to 73% A for 2 minutes, to 20% A for 9 minutes, to 10% A for 3.5 minutes, and to 1% A for 0.5 minutes. The detection wavelength was set to 202 nm.

Chemical standards and Tianqi capsule powder were dissolved in methanol. All solutions were filtered through Millex 0.22- $\mu$ m nylon membrane syringe filters before use. Magnoflo-

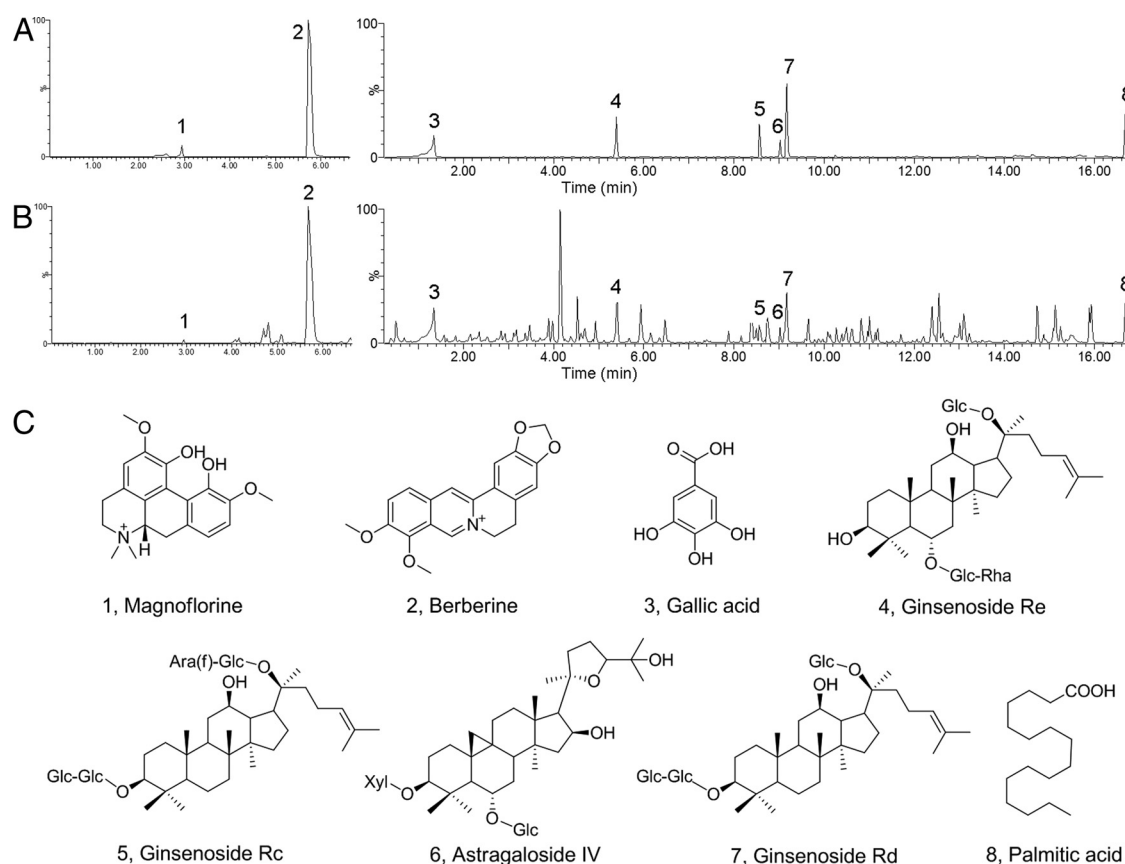

**Figure 2.** UPLC mass spectrometry analysis of Tianqi capsules. Representative total ion current (TIC) chromatograms of eight standards (A) and Tianqi capsules (B) is shown. Compound peaks include the following: 1, magnoflorine; 2, berberine; 3, gallic acid; 4, ginsenoside Re; 5, ginsenoside Rc; 6, astragaloside IV; 7, ginsenoside Rd; and 8, palmitic acid. Compounds 1 and 2 were monitored using the ESI-positive ion mode; compounds 3–8 were monitored using the ESI-negative ion mode. C, Chemical structures of assayed compounds in Tianqi capsules.

rine and berberine were determined using the electrospray ionization (ESI) positive ion mode, whereas gallic acid, astragaloside IV, palmitic acid, ginsenosides Re, Rc, and Rd were determined using ESI-negative ion mode. These compounds were used as the quality control markers in the Tianqi capsules. The contents of the eight compounds in the capsules were calculated using standard curves of corresponding standards. Representative chromatograms of standards and tested drug and chemical structures of marker compounds are shown in Figure 2. The contents of these marker compounds in the Tianqi capsules were as follows: magnoflorine ( $0.04 \pm 0.01$  mg/g), berberine ( $2.14 \pm 0.07$  mg/g), gallic acid ( $21.39 \pm 0.12$  mg/g), astragaloside IV ( $0.07 \pm 0.01$  mg/g), palmitic acid ( $3.55 \pm 0.08$  mg/g), ginsenosides Rc ( $0.31 \pm 0.01$  mg/g), Rd ( $0.60 \pm 0.02$ ), and Re ( $0.25 \pm 0.01$ ).

### Intervention and efficacy evaluation

The subjects were randomly allocated to receive either Tianqi or the placebo in capsulated forms for 12 months. Subjects in both the Tianqi and placebo groups were orally administered five capsules (1.6 g) three times daily before each meal.

The Tianqi or placebo treatment lasted 12 months. During this 12-month period, subjects were assessed every 3 months by undergoing a standard 75-g OGTT. The primary endpoint was the progression of IGT to T2DM over 12 months, based on changes in FPG and the results of 2-hour OGTT. Body weight and body mass index (BMI) were also monitored. Liver and kidney functions, routine blood and urine tests, and electrocar-

diograms were examined as safety indicators before and after the intervention. If a subject had confirmed diabetes (with a repeated OGTT in 1 week) at any 3-month interval, the individual was instructed to take the appropriate antihyperglycemic medications. Conversely, if a subject showed restored NGT or continuous IGT at any visit, the individual was instructed to continue their study medications.

### Randomization and blinding

A stratified, block randomization method was conducted by the study center. Study drugs were packed and numbered according to the random coding form and randomly allocated to each research site using concealed opaque envelopes. These envelopes and case report forms were not collected until the end of the trial. Study drugs were provided based on the assigned numbers, which were determined according to the visit sequence and study drug number sequence, and remained unchanged throughout the trial. Independent statisticians performed the data analysis (Peking University Health Science Center and China-Japan Friendship Hospital, China).

### Safety monitoring

Based on previous reported clinical trial and our pilot study using multiple Tianqi doses, observational human experience has indicated that the test herbal medication was well tolerated and not associated with any safety issues. We thus considered the



overall level of risk of the clinical study to be low. During the study, all adverse experiences were monitored and recorded on the case report form with special notes made on time of onset and resolution, severity, and the investigator's analysis of the relationship between the adverse experience and the test drug. The safety procedures were also in place when the proposal was approved by the local Medical Ethics Commission in China. A Data and Safety Monitoring Board was formed including physicians experienced in this research area and a biostatistician. The board was responsible for oversight all issues related the safety of the study subjects.

## Statistical analysis

Data entry was completed twice by two staff members using Epidata software. Continuous variables were summarized as means  $\pm$  SD, and categorical data were presented as frequencies. Data were analyzed using two-sided tests and Cox's regression model.  $\chi^2$  tests were used to compare the incidence of adverse events between the two groups. The level of statistical significance was set at  $P < .05$ .

## Results

### Subject characteristics

There were 804 subjects who participated in the initial screening and 480 subjects were recruited as having IGT. Sixty subjects were excluded after the run-in period due to NGT, T2DM, or other reasons. Of the 420 subjects with IGT who entered the randomization, 389 subjects completed the study including 198 in the Tianqi group and 191 in the placebo group. The remaining 31 subjects ( $n = 12$  in the Tianqi group and  $n = 19$  in the placebo group) dropped out of the study, mainly due to lack of follow-up, and one subject per group had mild adverse reactions (Figure 1).

The baseline clinical characteristics of the subjects are shown in Table 1. The mean BMI in both the Tianqi and placebo groups was 25 kg/m<sup>2</sup>. More than half of the subjects had elevated triglyceride, total cholesterol, and LDL

levels, whereas their BP was in the normal range. There were no significant differences at baseline in subjects' age, gender, FPG, 2-hour plasma glucose, lipid levels, BP, heart rate, BMI, and waist circumference between the two groups.

### Effects of Tianqi on glucose tolerance status

For each subject, the effects of Tianqi were evaluated at the end of the 12-month test drug administration. In addition, the effects of also were evaluated at the time point when the last subject completed the study. Thus, the effects on subjects after drug treatment were also to be evaluated.

At the end of the 12-month trial, 36 subjects in the Tianqi group (18.18%) and 56 in the placebo group (29.32%) had developed diabetes ( $P = .01$ ). There was a significant difference in the number of subjects who had NGT at the end of the study between the Tianqi and placebo groups ( $n = 125$ , 63.13%, and  $n = 89$ , 46.60%, respectively;  $P = .001$ ) (Figure 1A). The annual incidence of diabetes was 283.68 per 1000 person-years in the Tianqi group vs 424.72 per 1000 person-years in the placebo group. The Cox's proportional hazards model analysis showed that Tianqi reduced the risk of diabetes by 32.1% compared with the placebo (hazard ratio 0.679; 95% confidence interval 0.471–0.979), after adjusting for age and sex (Figure 3).

From the 11 study sites, obtained data generally distributed uniformly across the various sites. At the end of the 12-month trial, the number of subjects who had developed diabetes between the Tianqi and placebo groups, in range (mean), was 13.79%–25.00% (18.18%) and 26.67%–35.71% (29.32%), respectively. In addition, the number of subjects who had NGT at the end of the study between the Tianqi and placebo groups was 56.25%–68.97% (63.13%) and 42.80%–50.00% (46.60%), respectively.

**Table 1.** Subject Characteristics at the Baseline

|                           | Tianqi Group<br>(n = 210) | Placebo Group<br>(n = 210) | P Value |
|---------------------------|---------------------------|----------------------------|---------|
| Age, y                    | 52.95 $\pm$ 10.06         | 51.86 $\pm$ 10.16          | .38     |
| Sex, male/female          | 98/112                    | 106/104                    | .44     |
| FPG, mmol/L               | 6.11 $\pm$ 0.59           | 6.10 $\pm$ 0.56            | .93     |
| 2-Hour PG, mmol/L         | 9.07 $\pm$ 0.96           | 9.24 $\pm$ 0.98            | .07     |
| Triglycerides, mmol/L     | 1.86 $\pm$ 1.40           | 1.95 $\pm$ 1.17            | .44     |
| Total cholesterol, mmol/L | 4.89 $\pm$ 0.92           | 5.04 $\pm$ 0.99            | .08     |
| HDL, mmol/L               | 1.29 $\pm$ 0.38           | 1.32 $\pm$ 0.35            | .61     |
| LDL, mmol/L               | 2.84 $\pm$ 0.73           | 2.95 $\pm$ 0.84            | .14     |
| SBP, mm Hg                | 123.79 $\pm$ 12.80        | 123.63 $\pm$ 11.51         | .77     |
| DBP, mm Hg                | 77.40 $\pm$ 8.11          | 77.67 $\pm$ 7.60           | .73     |
| Heart rate, min           | 73.63 $\pm$ 7.07          | 72.62 $\pm$ 7.19           | .12     |
| BMI, kg/m <sup>2</sup>    | 25.15 $\pm$ 3.07          | 25.50 $\pm$ 2.66           | .25     |
| Waist circumference, cm   | 87.85 $\pm$ 9.43          | 88.73 $\pm$ 8.57           | .29     |

Abbreviations: 2-hour PG, 2-hour postload plasma glucose; HDL, high-density lipoprotein cholesterol; SBP, systolic BP; DBP, diastolic BP. Data are presented in mean  $\pm$  SD.

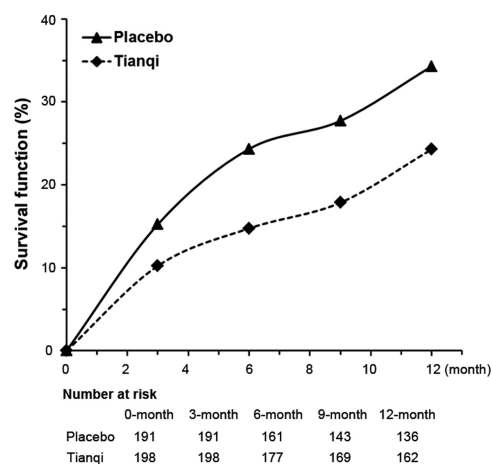

**Figure 3.** Percentage progression from IGT to type 2 diabetes in subjects treated with Tianqi or placebo for 12 months.

As shown in Figure 1B, when the last subject completed the study, 50 subjects in the Tianqi group (25.25%) and 67 in the placebo group (35.08%) still remained diabetic ( $P = .035$ ). However, there were 71 subjects in the Tianqi group (35.68%) and 71 in the placebo group (37.17%) who remained in NGT ( $P = .7878$ ).

### Effects of Tianqi on body weight and BMI changes

At 0, 6, and 12 months, the body weight in the Tianqi group ( $n = 198$ ) and the placebo group ( $n = 191$ ) were  $67.86 \pm 9.94$ ,  $67.69 \pm 10.24$ , and  $67.6 \pm 10.18$  kg and  $69.26 \pm 10.31$ ,  $69.04 \pm 9.85$ , and  $69.17 \pm 9.78$  kg, respectively. At 0, 6, and 12 months, the BMI in the Tianqi group ( $n = 198$ ) and the placebo group ( $n = 191$ ) were  $25.13 \pm 3.02$ ,  $25.04 \pm 3.00$ , and  $25.01 \pm 2.96$  and  $25.52 \pm 2.64$ ,  $25.45 \pm 2.72$ , and  $25.5 \pm 2.70$ , respectively. There were no statistical differences in body weight and BMI changes between the two groups at any of these time points.

### Safety and adverse events

Safety indicators are shown in Table 2. The table also shows that 26 subjects in total (15 in the Tianqi group and 11 in the placebo group) experienced adverse events, all of which were mild adverse reactions (grades 1–2). Gastrointestinal reactions, such as nausea, flatulence, constipation, and diarrhea, were the most common. These gastrointestinal events occurred in 15 subjects ( $n = 6$  in Tianqi group and  $n = 9$  in placebo group). In addition, in the Tianqi group, one subject experienced a skin rash and another subject experienced tinnitus. In the placebo group,

one subject experienced genital swelling and another subject experienced elevated urinary protein (Table 2). No severe adverse events occurred in the trial.

### Discussion

Compared with people without T2DM, patients with diabetes have a remarkably higher prevalence of complications and a higher mortality rate. Without intervention, individuals with IGT can develop T2DM. The prevalence of diabetes in China has reached 9.7% among people older than 20 years of age or 92 million people, and more than 100 million Chinese individuals have IGT (3, 4).

Several large-scale studies have demonstrated that improvements in unhealthy lifestyles or use of some antidiabetic drugs can effectively prevent diabetes. It was also reported that the lowering of BMI through dietary changes and increased physical exercise decreases the risk of diabetes among people with IGT by approximately 50%. A study that followed up residents of Daqing, China, for 20 years observed that group-based lifestyle interventions lasting more than 6 years could prevent or delay diabetes for up to 14 years after the initial intervention (4, 21). Of note, subjects who received the intervention spent a mean of 3.6 fewer years with diabetes than those who did not receive the lifestyle intervention. Clearly, effective lifestyle interventions are necessary for people with IGT.

Pharmacotherapies for IGT consist mainly of antidiabetic and antiobesity medications, which are shown to prevent or delay the progression of IGT to T2DM in sev-

**Table 2.** Safety Indicators and Adverse Events in Both Tianqi and Placebo Groups

|                                 | Tianqi (n = 210)  | Placebo (n = 210) | Total (n = 420) | P Value |
|---------------------------------|-------------------|-------------------|-----------------|---------|
| Safety indicators               |                   |                   |                 |         |
| SBP, mm Hg                      | 124.06 $\pm$ 9.81 | 123.31 $\pm$ 9.93 |                 | .45     |
| DBP, mm Hg                      | 77.46 $\pm$ 6.72  | 76.97 $\pm$ 7.24  |                 | .49     |
| Heart rate, min                 | 72.63 $\pm$ 5.93  | 72.99 $\pm$ 5.97  |                 | .55     |
| BUN, mmol/L                     | 5.35 $\pm$ 0.90   | 5.69 $\pm$ 1.10   |                 | .15     |
| CR, $\mu$ mol/L                 | 70.28 $\pm$ 18.55 | 68.74 $\pm$ 17.80 |                 | .69     |
| ALT, U/L                        | 22.47 $\pm$ 6.62  | 24.87 $\pm$ 8.98  |                 | .19     |
| AST, U/L                        | 23.71 $\pm$ 12.18 | 22.66 $\pm$ 8.51  |                 | 0.66    |
| Adverse events                  |                   |                   |                 |         |
| Gastrointestinal reactions      | 6 (2.85%)         | 9 (4.28%)         | 15 (3.57%)      |         |
| Rash                            | 1 (0.48%)         | 0                 | 1 (0.24%)       |         |
| Weakness                        | 1 (0.48%)         | 0                 | 1 (0.24%)       |         |
| Weight loss                     | 1 (0.48%)         | 0                 | 1 (0.24%)       |         |
| Frequent urination              | 1 (0.48%)         | 0                 | 1 (0.24%)       |         |
| Tinnitus                        | 1 (0.48%)         | 0                 | 1 (0.24%)       |         |
| Genital swelling                | 0                 | 1 (0.48%)         | 1 (0.24%)       |         |
| Elevated blood white blood cell | 1 (0.48%)         | 0                 | 1 (0.24%)       |         |
| Decreased hemoglobin            | 1 (0.48%)         | 0                 | 1 (0.24%)       |         |
| Elevated urine white blood cell | 2 (0.95%)         | 0                 | 2 (0.48%)       |         |
| Elevated urinary protein        | 0                 | 1 (0.48%)         | 1 (0.24%)       |         |
| Total                           | 15 (7.14%)        | 11 (5.24%)        | 26 (6.19%)      |         |

Abbreviations: ALT, aminotransferase; AST, aspartate aminotransferase; BUN, blood urea nitrogen; CR, creatinine; DBP, diastolic BP; SBP, systolic BP.

eral large-scale clinical trials, including Study to Prevent Non-Insulin-Dependent Diabetes Mellitus and Diabetes Prevention Program. Treating diabetes with Chinese herbal medicines is popular in China, particularly in the rural areas. Clinical trials have revealed that some traditional herbal medicines can control blood glucose levels and therefore have systemic benefits in patients with diabetes (22–26). However, controlled clinical trials have not been conducted to evaluate whether Chinese medicines are useful for the prevention of diabetes.

In the present controlled trial, we used a Chinese herbal medicine to prevent the transition from prediabetes to diabetes. To our knowledge, this was the first controlled trial to examine the efficacy of Chinese medicines among individuals with IGT. We observed that the Chinese herbal formulation Tianqi effectively delayed the progression from IGT to diabetes. The overall reduction in risk for diabetes over 12 months was 32.1%, which was less than that achieved by rosiglitazone in the Diabetes Reduction Assessment with Ramipril and Rosiglitazone Medication study (62%) (24, 27) and pioglitazone (72%) (28), but it was similar to that achieved by acarbose (25%) (29) and metformin (31%) (17, 30, 31). Our data also showed that after a period of cessation of the Tianqi treatment, the preventive effects on T2DM development remained significant.

Due to adverse effects, no pharmacotherapies are widely used in IGT subjects to prevent T2DM. In fact, long-term administration of acarbose or metformin is often associated with unfavorable gastrointestinal events. The Tianqi capsule, on the other hand, was generally safe and well tolerated in the present study. Preclinical acute toxicity studies showed that the dose of Tianqi used in this study was greater than 500-fold less than the toxic dose. Long-term toxicity experiments in Wistar rats also showed that continuous feeding with Tianqi at high doses for 6 months did not significantly affect body weight, complete blood count, or liver or kidney functions. In the current study, the adverse reactions associated with Tianqi were generally similar to those of the placebo, and no severe adverse events occurred, which suggested that this herbal drug is safe to use. Although the results of the present study need to be confirmed in future larger clinical trials, Tianqi holds promising potential as an effective and practical means to prevent T2DM, particularly in places in which herbal medicines are culturally accepted and widely used.

Our study had some limitations, such as the 12-month study period, which was relatively short. Due to limited research funding availability, plasma insulin levels and HbA1c were not able to be measured. Our data require

further verification in interventional studies with a larger sample size and longer length of treatment and follow-up.

In summary, the Tianqi capsule effectively reduced the incidence of diabetes in Chinese prediabetes subjects with IGT. This Chinese herbal medicine may help prevent diabetes in individuals who are at high risk of developing T2DM.

## Acknowledgments

We thank Drs Peter Bennett and Zhao-Ri Getu for reading this manuscript.

This clinical trial, with the number of ISRCTN90063632 is registered at [www.ISRCTN.org](http://www.ISRCTN.org).

Address all correspondence and requests for reprints to: Xiaolin Tong, Guang'anmen Hospital of China Academy of Chinese Medical Sciences, No 5. Beixiang Street, Xuanwu District, Beijing 100053, China. E-mail addresses for corresponding authors are as follows: [xiaolintong66@sina.com](mailto:xiaolintong66@sina.com); and Chun-Su Yuan, [cyuan@dacc.uchicago.edu](mailto:cyuan@dacc.uchicago.edu).

This work was supported in part by the Ministry of Science and Technology of the People's Republic of China, National Key Technology R&D Program (China) (Grant 2006BAI04A04-02).

Disclosure Summary: The authors have nothing to disclose.

## References

1. International Diabetes Federation. Diabetes atlas. <http://www.idf.org/diabetesatlas/>. Accessed August 15, 2013.
2. Unwin N, Shaw J, Zimmet P, Alberti KG. Impaired glucose tolerance and impaired fasting glycaemia: the current status on definition and intervention. *Diabet Med*. 2002;19:708–723.
3. Yang W, Lu J, Weng J, et al. Prevalence of diabetes among men and women in China. *N Engl J Med*. 2010;362:1090–1101.
4. Li G, Zhang P, Wang J, et al. The long-term effect of lifestyle interventions to prevent diabetes in the China Da Qing Diabetes Prevention Study: a 20-year follow-up study. *Lancet*. 2008;371:1783–1789.
5. Zhao Q, Guo B, Yang W. Tianqi capsule to treat type 2 diabetes: a trial of 300 cases. *J Shandong Univ Tradit Chin Med*. 2003;27:191–192.
6. Cai HQ, Ge HQ, Zhang XJ. Tianqi capsule to treat type 2 diabetes: a trial of 60 cases. *J Jilin Univ*. 2003;29:669–671.
7. Wu Y, Ou-Yang JP, Wu K, Wang Y, Zhou YF, Wen CY. Hypoglycemic effect of Astragalus polysaccharide and its effect on PTP1B. *Acta Pharmacol Sin*. 2005;26:345–352.
8. Zou F, Mao XQ, Wang N, Liu J, Ou-Yang JP. Astragalus polysaccharides alleviates glucose toxicity and restores glucose homeostasis in diabetic states via activation of AMPK. *Acta Pharmacol Sin*. 2009;30:1607–1615.
9. Tang LQ, Wei W, Chen LM, Liu S. Effects of berberine on diabetes induced by alloxan and a high-fat/high-cholesterol diet in rats. *J Ethnopharmacol*. 2006;108:109–115.
10. Wang C, Li J, Lv X, et al. Ameliorative effect of berberine on endothelial dysfunction in diabetic rats induced by high-fat diet and streptozotocin. *Eur J Pharmacol*. 2009;620:131–137.
11. Yin J, Xing H, Ye J. Efficacy of berberine in patients with type 2 diabetes mellitus. *Metabolism*. 2008;57:712–717.
12. Attele AS, Zhou YP, Xie JT, et al. Antidiabetic effects of Panax

- ginseng berry extract and the identification of an effective component. *Diabetes*. 2002;51:1851–1858.
13. Cho WC, Chung WS, Lee SK, Leung AW, Cheng CH, Yue KK. Ginsenoside Re of Panax ginseng possesses significant antioxidant and antihyperlipidemic efficacies in streptozotocin-induced diabetic rats. *Eur J Pharmacol*. 2006;550:173–179.
  14. Cho WC, Yip TT, Chung WS, et al. Altered expression of serum protein in ginsenoside Re-treated diabetic rats detected by SELDI-TOF MS. *J Ethnopharmacol*. 2006;108:272–279.
  15. Sakai K, Matsumoto K, Nishikawa T, et al. Mitochondrial reactive oxygen species reduce insulin secretion by pancreatic  $\beta$ -cells. *Biochem Biophys Res Commun*. 2003;300:216–222.
  16. Tong XL, Wu ST, Lian FM, et al. The safety and effectiveness of TM81, a Chinese herbal medicine, in the treatment of type 2 diabetes: a randomized double-blind placebo-controlled trial. *Diabetes Obes Metab*. 2013;15:448–454.
  17. Knowler WC, Barrett-Connor E, Fowler SE, et al. Reduction in the incidence of type 2 diabetes with lifestyle intervention or metformin. *N Engl J Med*. 2002;346:393–403.
  18. Edeoga C, Dagogo-Jack S. Understanding and identifying pre-diabetes—can we halt the diabetes epidemic? *Eur Endocrinol*. 2008;4:16–18.
  19. DeFronzo RA, Abdul-Ghani M. Type 2 diabetes can be prevented with early pharmacological intervention. *Diabetes Care*. 2011;34(suppl 2):S202–S209.
  20. Li YR, Yang XN, Yang YS, Chen XY, Dong C. Observation of clinical therapeutic effects on 64 cases of impaired glucose tolerance in traditional medicine intervention. *Chin J Exp Tradit Med Formul*. 2010;16:215–217.
  21. Kanat M, Mari A, Norton L, et al. Distinct  $\beta$ -cell defects in impaired fasting glucose and impaired glucose tolerance. *Diabetes*. 2012;61:447–453.
  22. Pan XR, Li GW, Hu YH, et al. Effects of diet and exercise in preventing NIDDM in people with impaired glucose tolerance. The Da Qing IGT and Diabetes Study. *Diabetes Care*. 1997;20:537–544.
  23. Li G, Hu Y, Yang W, et al. Effects of insulin resistance and insulin secretion on the efficacy of interventions to retard development of type 2 diabetes mellitus: the DA Qing IGT and Diabetes Study. *Diabetes Res Clin Pract*. 2002;58:193–200.
  24. Kuriyan R, Rajendran R, Bantwal G, Kurpad AV. Effect of supplementation of Coccinia cordifolia extract on newly detected diabetic patients. *Diabetes Care*. 2008;31:216–220.
  25. Tong XL, Dong L, Chen L, Zhen Z. Treatment of diabetes using traditional Chinese medicine: past, present and future. *Am J Chin Med*. 2012;40:877–886.
  26. Huang W, Yu J, Jia X, Xiong L, Li N, Wen X. Zhenqing recipe improves glucose metabolism and insulin sensitivity by repressing hepatic FOXO1 in type 2 diabetic rats. *Am J Chin Med*. 2012;40:721–733.
  27. Gerstein HC, Yusuf S, Bosch J, et al. Effect of rosiglitazone on the frequency of diabetes in patients with impaired glucose tolerance or impaired fasting glucose: a randomised controlled trial. *Lancet*. 2006;368:1096–1105.
  28. DeFronzo RA, Tripathy D, Schwenke DC, et al. Pioglitazone for diabetes prevention in impaired glucose tolerance. *N Engl J Med*. 2011;364:1104–1115.
  29. Chiasson JL, Josse RG, Gomis R, Hanefeld M, Karasik A, Laakso M. Acarbose for prevention of type 2 diabetes mellitus: the STOP-NIDDM randomised trial. *Lancet*. 2002;359:2072–2077.
  30. Tuomilehto J, Lindstrom J, Hellmich M, et al. Development and validation of a risk-score model for subjects with impaired glucose tolerance for the assessment of the risk of type 2 diabetes mellitus—The STOP-NIDDM risk-score. *Diabetes Res Clin Pract*. 2010;87:267–274.
  31. Ratner R, Goldberg R, Haffner S, et al. Impact of intensive lifestyle and metformin therapy on cardiovascular disease risk factors in the diabetes prevention program. *Diabetes Care*. 2005;28:888–894.

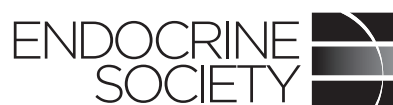

**Refer a new full member** to The Endocrine Society  
and you could receive a \$20 Starbucks Card when they join.

[www.endocrine.org/refer](http://www.endocrine.org/refer)

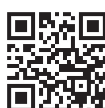

Source: http://academic.oup.com/jcem/article-pdf/99/2/648/9047569/jcem0648.pdf
